# Supplementary material
Source: Springer Nature journal article supplement (https://www.springermedizin.de/resource/supplementary/12874_2012_848_MOESM2_ESM.pdf/9432680)

Contamination vs. bacteremia

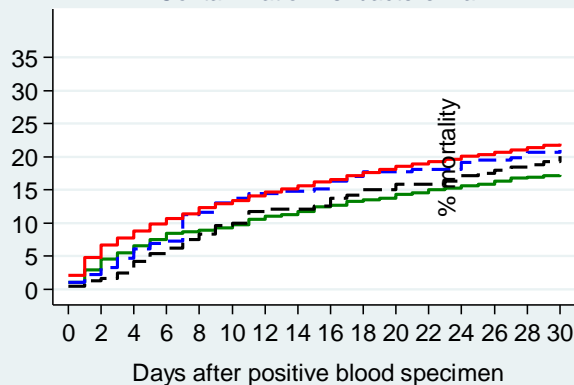

Monomicrobial vs. polymicrobial

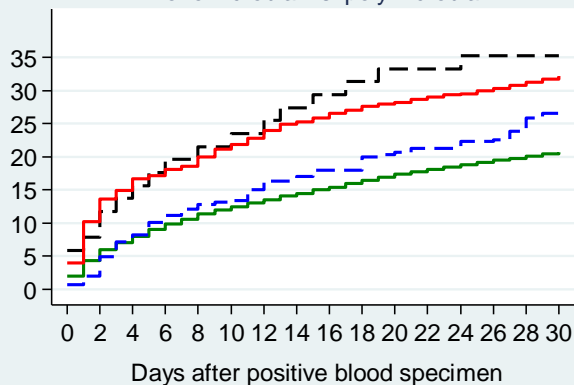

Community- vs. hospital-onset

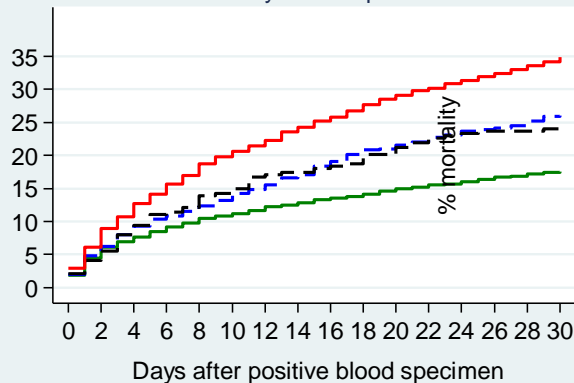

Healthcare- vs. no healthcare-association

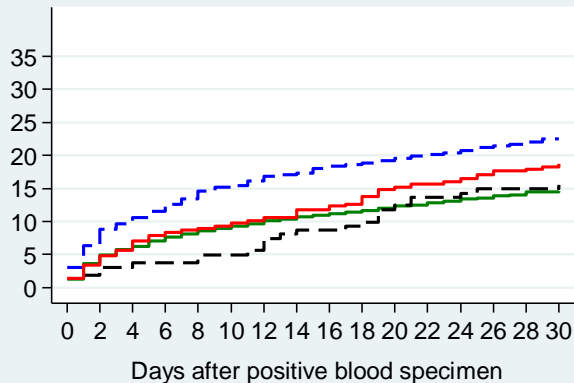

Supplement: MOESM2 [file 9432680]
